# Supplementary material for: Construction and validation of a predictive model for the efficacy of neoadjuvant chemotherapy combined with immunotherapy in locally advanced gastric cancer: a single-center retrospective study
Source: Research Square preprint supplement (doi:10.21203/rs.3.rs-6956911/v1), 2025-08-01
Supplement: Supplementary file 1 [file 617cedefd7053107a49a537f.docx]

| **Supplementary Table 1: Variable Coding Table** | | |
| --- | --- | --- |
| **Variable** | **Label** | **Coding of categorical variables** |
| age | Age |  |
| sex | Gender | 0:Male; 1:Female |
| BMI | Body Mass Index (kg/m2) |  |
| ECOG | ECOG score | 0:0 points; 1:1 points |
| DM | Diabetes | 0: No; 1: Yes |
| HTN | Hypertension | 0: No; 1: Yes |
| Differ | Tumor differentiation degree | 0: Poor-differentiated;  1: Well-differentiated |
| SRCC | Signet ring cell carcinoma | 0: No; 1: Yes |
| Location | Tumor location | 1: Upper; 2: Middle; 3: Lower |
| cT | Clinical T stage | 0: T1-T2; 1: T3-T4 |
| cN | Clinical N stage | 0: N0; 1: N+ |
| MMR | Mismatch Repair | 0: dMMR; 1: pMMR |
| HER-2 | HER-2 | 0: Negative; 1: Positive |
| PD-L1 | programmed death 1 | 0: ＜1; 1: ≥1 |
| CEA | CEA | 0: ≤5; 1: ＞5 |
| AFP | AFP | 0: ≤7; 1: ＞7 |
| CA199 | CA199 | 0: ≤30; 1: ＞30 |
| CA125 | CA125 | 0: ≤24; 1: ＞24 |
| CA724 | CA724 | 0: ≤6.9; 1: ＞6.9 |
| WBC | White blood cell count |  |
| NEUT | Neutrophil count |  |
| LYM | Lymphocyte count |  |
| RBC | Red blood cell count |  |
| PLT | Platelet count |  |
| NLR | Neutrophil to lymphocyte ratio |  |
| PLR | Platelet to lymphocyte ratio |  |
| SII | Systemic immune-inflammation index |  |
| Surgery | Surgery type | 1: Proximal gastrectomy; 2: Distal gastrectomy; 3: Total gastrectomy |
| R0 | Extent of resection | 0:Yes; 1: No |
| Response | Treatment response | 0: No-Response; 1:Response |
| ypT | Pathological T stage | 0: Tx; 1: T1; 2: T2; 3: T3; 4:T4 |
| ypN | Pathological N stage | 0:N0; 1: N1; 2: N2; 3: N3 |
| stage | Pathological TNM stage | 0:pathological complete response;  1: StageⅠ; 2: StageⅡ; 3: StageⅢ |
| Lauren | Lauren classification | 1: Intestinal; 2: Diffuse; 3: Mixed |
| Diameter | Tumor maximum diameter |  |
| LNP | Number of positive lymph nodes |  |
| LN | Total number of lymph nodes |  |
| PNI | Perineural Invasion | 0: Negative; 1: Positive |
| LVI | Lymphovascular Invasion | 0: Negative; 1: Positive |
| Ki67 | Ki67 |  |
