# Supplementary material for: Construction and validation of a predictive model for the efficacy of neoadjuvant chemotherapy combined with immunotherapy in locally advanced gastric cancer: a single-center retrospective study
Source: Research Square preprint supplement (doi:10.21203/rs.3.rs-6956911/v1), 2025-08-01
Supplement: Supplementary file 2 [file d8d67f16709c0b09a00c1735.docx]

| Supplementary Table 2: Results of Multivariate Logistic Analysis | | | | |
| --- | --- | --- | --- | --- |
| Dependent: Response |  | No-Response (N=92) | Response (N=52) | OR (multivariable) |
| DM | No | 81 (88%) | 38 (73.1%) |  |
|  | Yes | 11 (12%) | 14 (26.9%) | 1.94 (0.72-5.26, p=.190) |
| PD_L1 | ＜1 | 50 (54.3%) | 16 (30.8%) |  |
|  | ≥1 | 42 (45.7%) | 36 (69.2%) | 3.03 (1.31-7.00, p=.010) |
| Differ | Poor-differentiated | 74 (80.4%) | 27 (51.9%) |  |
|  | Well-differentiated | 18 (19.6%) | 25 (48.1%) | 3.91 (1.65-9.25, p=.002) |
| SRCC | No | 64 (69.6%) | 47 (90.4%) |  |
|  | Yes | 28 (30.4%) | 5 (9.6%) | 0.30 (0.10-0.90, p=.032) |
| CA724 | ≤6.9 | 57 (62%) | 43 (82.7%) |  |
|  | ＞6.9 | 35 (38%) | 9 (17.3%) | 0.38 (0.15-0.96, p=.040) |
| NLR | Mean ± SD | 3.0 ± 1.3 | 2.5 ± 1.1 | 0.68 (0.48-0.96, p=.029) |
| DM: Diabetes Mellitus; PD-1: Programmed death 1; SRCC: Signet-ring cell carcinoma; NLR: Neutrophil to lymphocyte ratio. | | | | |
